# Supplementary material for: Multilevel examination of diabetes in modernising China: what elements of urbanisation are most associated with diabetes?
Source: PubMed Central journal article supplement — Diabetologia. 2012 Aug 26;55(12):3182–92. doi: 10.1007/s00125-012-2697-8 (PMC3483108; doi:10.1007/s00125-012-2697-8), 2012-08-26
Supplement: 125_2012_2697_MOESM2_ESM.pdf [file 125_2012_2697_MOESM2_ESM.pdf]

**ESM Fig. 2** ORs for diabetes prevalence across the 12 individual urbanisation components, by sex<sup>a,b</sup>

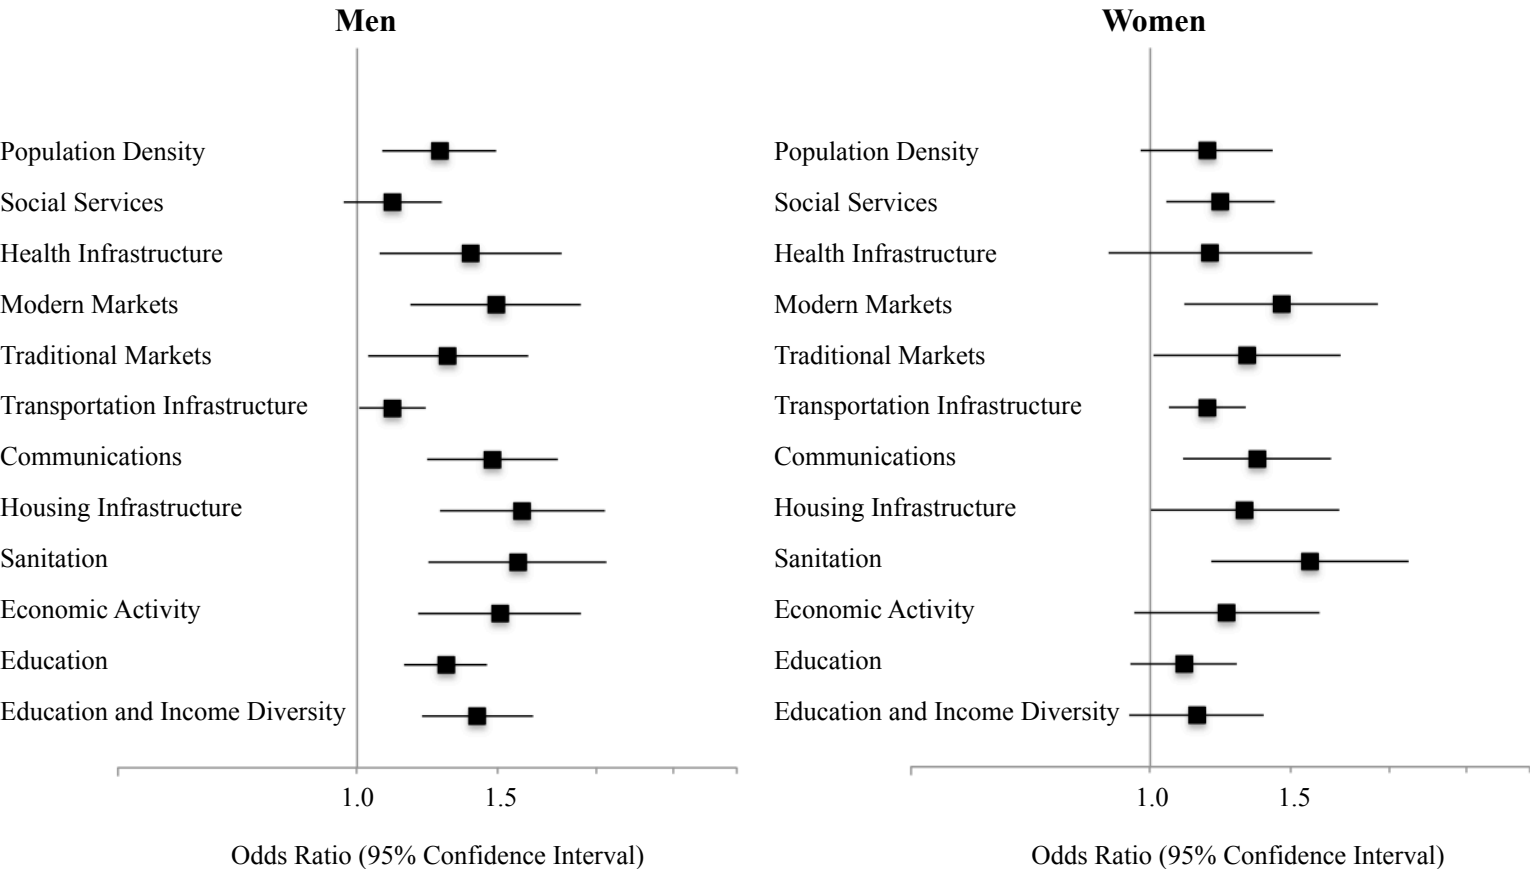

<sup>a</sup>Results of 12 sex-stratified multilevel logistic regression models per sex, with individual-level age and household income as fixed effects and with the community and province of residence as random effects

<sup>b</sup>ORs for diabetes prevalence presented for the 75<sup>th</sup> (high) relative to the 25<sup>th</sup> (low) percentile of each of the 12 urbanisation index components
