# Supplementary material for: Multilevel examination of diabetes in modernising China: what elements of urbanisation are most associated with diabetes?
Source: PubMed Central journal article supplement — Diabetologia. 2012 Aug 26;55(12):3182–92. doi: 10.1007/s00125-012-2697-8 (PMC3483108; doi:10.1007/s00125-012-2697-8), 2012-08-26
Supplement: 125_2012_2697_MOESM3_ESM.pdf [file 125_2012_2697_MOESM3_ESM.pdf]

**ESM Table 1** ORs and province- and community-level variance for diabetes prevalence across total urbanisation and its components while controlling for continuous body mass index<sup>a,b</sup>

| Urbanisation level or component                     | Men                            |         |               |      |               |      | Women             |         |               |      |             |      |
|-----------------------------------------------------|--------------------------------|---------|---------------|------|---------------|------|-------------------|---------|---------------|------|-------------|------|
|                                                     | OR (95%CI)                     | P Value | Province      |      | Community     |      | OR (95%CI)        | P Value | Province      |      | Community   |      |
|                                                     |                                |         | Variance (SE) | ICC  | Variance (SE) | ICC  |                   |         | Variance (SE) | ICC  |             |      |
| <b>Total Urbanization Level<sup>c</sup></b>         |                                |         |               |      |               |      |                   |         |               |      |             |      |
| Low                                                 | 1                              |         | 0.59 (0.04)   | 0.02 | 0.00 (0.08)   | 0    | 1                 |         | 0.03 (0.04)   | 0    | 0.05 (0.09) | 0.01 |
| Medium                                              | 1.34 (0.97, 1.88)              | 0.08    |               |      |               |      | 1.38 (0.96, 1.99) | 0.08    |               |      |             |      |
| High                                                | 1.71 (1.24, 2.37)              | 0.001   |               |      |               |      | 1.76 (1.24, 2.51) | 0.002   |               |      |             |      |
| <b>12 Urbanization Index Components<sup>d</sup></b> |                                |         |               |      |               |      |                   |         |               |      |             |      |
| Population Density                                  | 1.23 (1.04, 1.45)              | 0.01    | 0.05 (0.04)   | 0.02 | 0.00 (0.08)   | 0.00 | 1.17 (0.98, 1.41) | 0.09    | 0.04 (0.04)   | 0.01 | 0.08 (0.09) | 0.02 |
| Social Services                                     | 1.05 (0.91, 1.21)              | 0.51    | 0.06 (0.04)   | 0.02 | 0.03 (0.08)   | 0.01 | 1.18 (1.02, 1.38) | 0.03    | 0.03 (0.04)   | 0.01 | 0.08 (0.10) | 0.02 |
| Health Infrastructure                               | 1.31 (1.01, 1.70)              | 0.04    | 0.04 (0.04)   | 0.01 | 0.03 (0.08)   | 0.01 | 1.14 (0.86, 1.52) | 0.36    | 0.04 (0.04)   | 0.01 | 0.10 (0.10) | 0.03 |
| Modern Markets                                      | 1.31 (1.02, 1.68)              | 0.032   | 0.07 (0.05)   | 0.02 | 0.02 (0.08)   | 0.01 | 1.40 (1.06, 1.83) | 0.02    | 0.04 (0.04)   | 0.01 | 0.08 (0.09) | 0.02 |
| Traditional Markets                                 | 1.19 (0.94, 1.50)              | 0.14    | 0.06 (0.05)   | 0.02 | 0.02 (0.08)   | 0.01 | 1.32 (1.02, 1.71) | 0.04    | 0.05 (0.05)   | 0.01 | 0.08 (0.09) | 0.02 |
| Transportation Infrastructure                       | 1.07 (0.97, 1.18)              | 0.16    | 0.06 (0.04)   | 0.02 | 0.02 (0.08)   | 0.00 | 1.16 (1.04, 1.29) | 0.007   | 0.04 (0.04)   | 0.01 | 0.07 (0.09) | 0.02 |
| Communications                                      | 1.34 (1.11, 1.62)              | 0.003   | 0.06 (0.04)   | 0.02 | 0.00 (0.00)   | 0.00 | 1.28 (1.04, 1.58) | 0.02    | 0.03 (0.04)   | 0.01 | 0.08 (0.10) | 0.02 |
| Housing Infrastructure                              | 1.41 (1.10, 1.79)              | 0.006   | 0.07 (0.05)   | 0.02 | 0.00 (0.08)   | 0.00 | 1.24 (0.95, 1.62) | 0.11    | 0.04 (0.04)   | 0.01 | 0.09 (0.09) | 0.03 |
| Sanitation                                          | 1.38 (1.06, 1.78)              | 0.02    | 0.05 (0.04)   | 0.02 | 0.02 (0.08)   | 0.01 | 1.44 (1.09, 1.90) | 0.01    | 0.04 (0.04)   | 0.01 | 0.07 (0.09) | 0.02 |
| Economic Activity                                   | 1.35 (1.07, 1.71)              | 0.01    | 0.06 (0.04)   | 0.02 | 0.02 (0.08)   | 0.01 | 1.16 (0.89, 1.51) | 0.27    | 0.04 (0.04)   | 0.01 | 0.09 (0.10) | 0.03 |
| Education                                           | 1.22 (1.08, 1.38) <sup>e</sup> | 0.001   | 0.05 (0.04)   | 0.02 | 0.00 (0.08)   | 0.00 | 1.09 (0.94, 1.27) | 0.24    | 0.03 (0.04)   | 0.01 | 0.10 (0.10) | 0.03 |
| Education and Income Diversity                      | 1.34 (1.14, 1.58) <sup>e</sup> | <0.001  | 0.04 (0.04)   | 0.01 | 0.00 (0.08)   | 0.00 | 1.09 (0.91, 1.32) | 0.36    | 0.04 (0.04)   | 0.01 | 0.10 (0.10) | 0.03 |

<sup>a</sup>26 separate sex-stratified multilevel models for total urbanisation and its components

<sup>b</sup>Diabetes defined as a fasting blood glucose  $\geq 7.0$  mmol/l or doctor diagnosis of diabetes

<sup>c</sup>ORs for diabetes prevalence presented for medium (59.0-82.2) and high ( $\geq 82.3$ ) (range 30.4-106.6) relative to low urbanisation level (<59.0)

<sup>d</sup>ORs for diabetes prevalence presented for the 75<sup>th</sup> (high) relative to the 25<sup>th</sup> (low) percentile of each of the 12 urbanisation index components

<sup>e</sup>OR statistically significant at bonferroni-corrected  $p < 0.002$  (type 1 error rate=0.05 across 24 models) by two-tailed z test
