# Supplementary material for: Multilevel examination of diabetes in modernising China: what elements of urbanisation are most associated with diabetes?
Source: PubMed Central journal article supplement — Diabetologia. 2012 Aug 26;55(12):3182–92. doi: 10.1007/s00125-012-2697-8 (PMC3483108; doi:10.1007/s00125-012-2697-8), 2012-08-26
Supplement: 125_2012_2697_MOESM6_ESM.pdf [file 125_2012_2697_MOESM6_ESM.pdf]

**ESM Table 4** Prevalence [% (SE)] of undiagnosed, diagnosed, and total diabetes by urbanisation level and province<sup>a, b</sup>

| <b>Urbanisation Level or Province</b>           | <b>Sample no.</b> | <b>Undiagnosed Diabetes no. (%)</b> | <b>Diagnosed Diabetes no. (%)</b> | <b>Total Diabetes<sup>c</sup> no. (%)</b> |
|-------------------------------------------------|-------------------|-------------------------------------|-----------------------------------|-------------------------------------------|
|                                                 | n=7,741           | n=364                               | n=229                             | n=593                                     |
| <b>Community-Level Total Urbanisation Level</b> |                   |                                     |                                   |                                           |
| Low                                             | 2,571             | 4.2 (0.4)                           | 1.0 (0.1)                         | 5.1 (0.4)                                 |
| Medium                                          | 2,588             | 4.6 (0.4)                           | 2.9 (0.3)                         | 7.5 (0.5)                                 |
| High                                            | 2,582             | 5.3 (0.4)                           | 5.0 (0.4)                         | 10.3 (0.6)                                |
| <b>Province</b>                                 |                   |                                     |                                   |                                           |
| Heilongjiang                                    | 847               | 3.9 (0.7)                           | 2.4 (0.5)                         | 6.3 (0.8)                                 |
| Guizhou                                         | 657               | 3.5 (0.7)                           | 2.1 (0.6)                         | 5.6 (0.9)                                 |
| Henan                                           | 856               | 6.2 (0.8)                           | 2.5 (0.5)                         | 8.6 (1.0)                                 |
| Liaoning                                        | 723               | 6.4 (0.9)                           | 5.3 (0.8)                         | 11.6 (1.2)                                |
| Shandong                                        | 879               | 7.4 (0.9)                           | 4.7 (0.7)                         | 12.1 (1.0)                                |
| Hubei                                           | 808               | 4.0 (0.7)                           | 1.9 (0.5)                         | 5.8 (0.8)                                 |
| Guangxi                                         | 968               | 3.5 (0.6)                           | 1.2 (0.4)                         | 4.8 (0.7)                                 |
| Hunan                                           | 956               | 3.5 (0.6)                           | 3.3 (0.9)                         | 6.8 (0.8)                                 |
| Jiangso                                         | 1,047             | 4.3 (0.6)                           | 3.4 (0.6)                         | 7.7 (0.8)                                 |

<sup>a</sup>Diagnosed diabetes defined as self-reported doctor diagnosis of diabetes; undiagnosed diabetes defined as a FBG $\geq$ 7.0 mmol/l and no doctor diagnosis of diabetes Total diabetes is undiagnosed plus diagnosed diabetes

<sup>b</sup>Urbanisation level based on tertiles of urbanization index (range: 30.4-106.6) representing low (<59.0), medium (59.0-82.2), and high ( $\geq$ 82.3) levels of urbanisation

<sup>c</sup>Percentages of undiagnosed and diagnosed diabetes may not equal total diabetes due to rounding

All differences in proportion of sample within undiagnosed or diagnosed diabetes across levels of urbanisation and across the nine provinces are statistically significant at  $p < 0.05$  level using  $\chi^2$  tests, with the exception of undiagnosed diabetes, which did not differ statistically across urbanisation level
