# Supplementary material for: Multilevel examination of diabetes in modernising China: what elements of urbanisation are most associated with diabetes?
Source: PubMed Central journal article supplement — Diabetologia. 2012 Aug 26;55(12):3182–92. doi: 10.1007/s00125-012-2697-8 (PMC3483108; doi:10.1007/s00125-012-2697-8), 2012-08-26
Supplement: 125_2012_2697_MOESM7_ESM.pdf [file 125_2012_2697_MOESM7_ESM.pdf]

**ESM Table 5** ORs and province- and community-level variance for diagnosed and undiagnosed diabetes prevalence by urbanisation level<sup>a</sup>

| Urbanisation level                                        | Men                |         |               |      |               |      | Women             |         |               |      |               |      |
|-----------------------------------------------------------|--------------------|---------|---------------|------|---------------|------|-------------------|---------|---------------|------|---------------|------|
|                                                           | OR (95%CI)         | P value | Province      |      | Community     |      | OR (95%CI)        | p value | Province      |      | Community     |      |
|                                                           |                    |         | Variance (SE) | ICC  | Variance (SE) | ICC  |                   |         | Variance (SE) | ICC  | Variance (SE) | ICC  |
| <b>Diagnosed - Total Urbanisation Level<sup>b</sup></b>   |                    |         |               |      |               |      |                   |         |               |      |               |      |
| Low                                                       | 1                  |         | 0.16 (0.12)   | 0.05 | 0.00 (0.00)   | 0    | 1                 |         | 0.14 (0.13)   | 0.04 | 0.17 (0.22)   | 0.05 |
| Medium                                                    | 3.08 (1.56, 6.06)  | 0.001   |               |      |               |      | 3.07 (1.56, 6.06) | 0.001   |               |      |               |      |
| High                                                      | 5.86 (3.08, 11.15) | <0.001  |               |      |               |      | 4.03 (2.09, 7.78) | <0.001  |               |      |               |      |
| <b>Undiagnosed - Total Urbanisation Level<sup>b</sup></b> |                    |         |               |      |               |      |                   |         |               |      |               |      |
| Low                                                       | 1                  |         | 0.10 (0.07)   | 0.03 | 0.07 (0.12)   | 0.02 | 1                 |         | 0.01 (0.05)   | 0    | 0.35 (0.20)   | 0.1  |
| Medium                                                    | 1.22 (0.82, 1.80)  | 0.32    |               |      |               |      | 1.09 (0.68, 1.74) | 0.72    |               |      |               |      |
| High                                                      | 1.25 (0.84, 1.85)  | 0.27    |               |      |               |      | 1.38 (0.88, 2.17) | 0.16    |               |      |               |      |

<sup>a</sup>Diagnosed diabetes defined as self-reported doctor diagnosis of diabetes; undiagnosed diabetes defined as a fasting blood glucose  $\geq 7.0$  mmol/l and no doctor diagnosis of diabetes

<sup>b</sup>Urbanisation level based on tertiles of urbanisation index (range: 30.4-106.6) representing low (<59.0), medium (59.0-82.2), and high ( $\geq 82.3$ ) levels of urbanisation
