# Supplementary material for: Multilevel examination of diabetes in modernising China: what elements of urbanisation are most associated with diabetes?
Source: Springer Nature journal article supplement (doi:10.1007/s00125-012-2697-8), 2012-08-25
Supplement: MOESM1 [file 8091132]

**ESM Fig. 1** ORs for diabetes prevalence across medium and high (versus low) urbanisation, by sex<sup>a,b</sup>

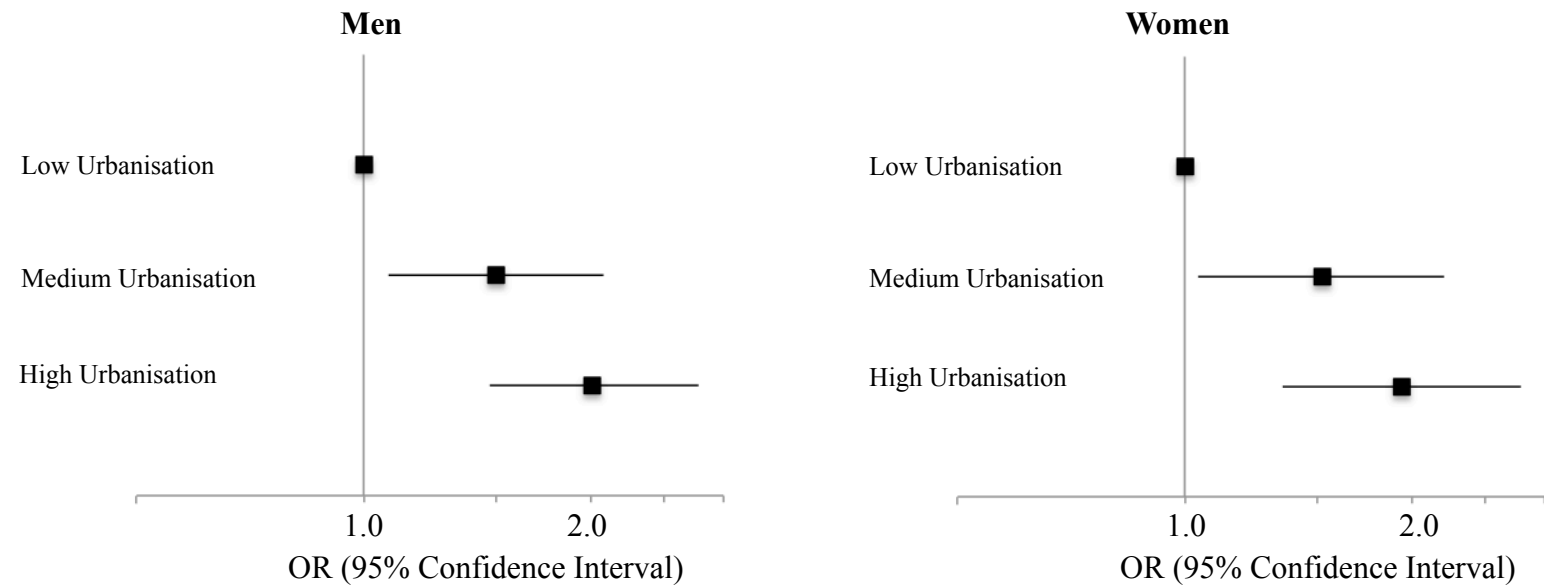

<sup>a</sup>Sex-stratified multilevel logistic regression models, with individual-level age and household income as fixed effects and with the community and province of residence as random effects

<sup>b</sup>Urbanisation level based on tertiles of urbanisation index (range: 30.4-106.6) representing low (<59.0), medium (59.0-82.2), and high ( $\geq 82.3$ ) levels of urbanisation
