# Supplementary material for: Multilevel examination of diabetes in modernising China: what elements of urbanisation are most associated with diabetes?
Source: Springer Nature journal article supplement (doi:10.1007/s00125-012-2697-8), 2012-08-25
Supplement: MOESM4 [file 8091132]

**ESM Table 2** ORs and province- and community-level variance for diabetes prevalence according to HbA<sub>1c</sub> diagnostic criterion across levels of total urbanisation and its components<sup>a,b</sup>

| Urbanisation level or component                     | Men                            |                |               |      |               |      | Women                          |                |               |      |               |      |
|-----------------------------------------------------|--------------------------------|----------------|---------------|------|---------------|------|--------------------------------|----------------|---------------|------|---------------|------|
|                                                     |                                |                | Province      |      | Community     |      |                                |                | Province      |      | Community     |      |
|                                                     | OR (95%CI)                     | <i>p</i> value | Variance (SE) | ICC  | Variance (SE) | ICC  | OR (95%CI)                     | <i>p</i> value | Variance (SE) | ICC  | Variance (SE) | ICC  |
| <b>Total Urbanisation Level<sup>c</sup></b>         |                                |                |               |      |               |      |                                |                |               |      |               |      |
| Low                                                 | 1                              |                | 0.28 (0.16)   | 0.07 | 0.27 (0.12)   | 0.07 | 1                              |                | 0.27 (0.15)   | 0.07 | 0.19 (0.10)   | 0.05 |
| Medium                                              | 1.33 (0.89, 1.99)              | 0.17           |               |      |               |      | 2.08 (1.42, 3.06)              | <0.001         |               |      |               |      |
| High                                                | 1.71 (1.16, 2.54)              | 0.007          |               |      |               |      | 2.11 (1.44, 3.10)              | <0.001         |               |      |               |      |
| <b>12 Urbanisation Index Components<sup>d</sup></b> |                                |                |               |      |               |      |                                |                |               |      |               |      |
| Population Density                                  | 1.09 (0.88, 1.36)              | 0.41           | 0.27 (0.15)   | 0.07 | 0.30 (0.12)   | 0.08 | 1.17 (0.96, 1.44)              | 0.12           | 0.28 (0.16)   | 0.07 | 0.27 (0.11)   | 0.08 |
| Social Services                                     | 0.97 (0.81, 1.17)              | 0.77           | 0.27 (0.16)   | 0.07 | 0.31 (0.12)   | 0.08 | 1.22 (1.03, 1.43)              | 0.02           | 0.26 (0.15)   | 0.07 | 0.24 (0.10)   | 0.08 |
| Health Infrastructure                               | 1.51 (1.10, 2.08)              | 0.01           | 0.25 (0.14)   | 0.07 | 0.29 (0.12)   | 0.08 | 1.20 (0.89, 1.64)              | 0.24           | 0.27 (0.15)   | 0.07 | 0.28 (0.11)   | 0.08 |
| Modern Markets                                      | 1.52 (1.11, 2.06)              | 0.008          | 0.31 (0.17)   | 0.07 | 0.27 (0.11)   | 0.08 | 1.46 (1.09, 1.98)              | 0.01           | 0.29 (0.16)   | 0.07 | 0.25 (0.10)   | 0.08 |
| Traditional Markets                                 | 1.36 (1.02, 1.81)              | 0.04           | 0.31 (0.17)   | 0.07 | 0.28 (0.12)   | 0.08 | 1.57 (1.19, 2.08) <sup>e</sup> | 0.001          | 0.31 (0.17)   | 0.07 | 0.23 (0.10)   | 0.08 |
| Transportation Infrastructure                       | 1.00 (0.88, 1.12)              | 0.96           | 0.27 (0.16)   | 0.07 | 0.31 (0.12)   | 0.08 | 1.12 (1.00, 1.26)              | 0.05           | 0.29 (0.17)   | 0.07 | 0.26 (0.11)   | 0.08 |
| Communications                                      | 1.47 (1.15, 1.87) <sup>e</sup> | 0.002          | 0.24 (0.14)   | 0.07 | 0.26 (0.12)   | 0.08 | 1.53 (1.22, 1.92) <sup>e</sup> | <0.001         | 0.22 (0.13)   | 0.07 | 0.22 (0.10)   | 0.08 |
| Housing Infrastructure                              | 1.49 (1.11, 1.99)              | 0.008          | 0.31 (0.17)   | 0.07 | 0.27 (0.12)   | 0.08 | 1.45 (1.10, 1.93)              | 0.009          | 0.31 (0.17)   | 0.07 | 0.24 (0.10)   | 0.08 |
| Sanitation                                          | 1.72 (1.25, 2.38) <sup>e</sup> | 0.001          | 0.27 (0.15)   | 0.07 | 0.26 (0.11)   | 0.08 | 1.57 (1.16, 2.13)              | 0.004          | 0.26 (0.15)   | 0.07 | 0.23 (0.10)   | 0.08 |
| Economic Activity                                   | 1.52 (1.14, 2.02)              | 0.004          | 0.27 (0.15)   | 0.07 | 0.27 (0.12)   | 0.08 | 1.32 (1.00, 1.74)              | 0.05           | 0.27 (0.16)   | 0.07 | 0.26 (0.10)   | 0.08 |
| Education                                           | 1.33 (1.14, 1.54) <sup>e</sup> | <0.001         | 0.26 (0.15)   | 0.07 | 0.24 (0.11)   | 0.08 | 1.15 (0.98, 1.34)              | 0.09           | 0.27 (0.15)   | 0.07 | 0.26 (0.11)   | 0.08 |
| Education and Income Diversity                      | 1.52 (1.14, 2.02)              | 0.004          | 0.27 (0.15)   | 0.07 | 0.27 (0.12)   | 0.08 | 1.20 (0.98, 1.47)              | 0.08           | 0.27 (0.16)   | 0.07 | 0.26 (0.10)   | 0.08 |

<sup>a</sup>26 separate sex-stratified multilevel models for total urbanisation and its components

<sup>b</sup>Diabetes defined as an HbA<sub>1c</sub> ≥ 6.5% (48 mmol/mol) or doctor diagnosis of diabetes

<sup>c</sup>ORs for diabetes prevalence presented for medium (59.0-82.2) and high (≥82.3) (range 30.4-106.6) relative to low urbanisation level (<59.0)

<sup>d</sup>ORs for diabetes prevalence presented for the 75<sup>th</sup> (high) relative to the 25<sup>th</sup> (low) percentile of each of the 12 urbanisation index components

<sup>e</sup>OR statistically significant at bonferroni-corrected  $p < 0.002$  (type 1 error rate=0.05 across 24 models) by two-tailed z test
