# Supplementary material for: Multilevel examination of diabetes in modernising China: what elements of urbanisation are most associated with diabetes?
Source: Springer Nature journal article supplement (doi:10.1007/s00125-012-2697-8), 2012-08-25
Supplement: MOESM5 [file 8091132]

**ESM Table 3** ORs and province- and community-level variance for diabetes prevalence according to a combination of HbA<sub>1c</sub> and/or FBG diagnostic criteria across levels of total urbanisation and its components<sup>a,b</sup>

| Urbanisation level or component                     | Men                            |         |               |      |               |      | Women                          |         |               |      |             |      |
|-----------------------------------------------------|--------------------------------|---------|---------------|------|---------------|------|--------------------------------|---------|---------------|------|-------------|------|
|                                                     | OR (95%CI)                     | p value | Province      |      | Community     |      | OR (95%CI)                     | p value | Province      |      | Community   |      |
|                                                     |                                |         | Variance (SE) | ICC  | Variance (SE) | ICC  |                                |         | Variance (SE) | ICC  |             |      |
| <b>Total Urbanization Level<sup>c</sup></b>         |                                |         |               |      |               |      |                                |         |               |      |             |      |
| Low                                                 | 1                              |         | 0.17 (0.09)   | 0.05 | 0.04 (0.06)   | 0.01 | 1                              |         | 0.13 (0.08)   | 0.04 | 0.22 (0.09) | 0.06 |
| Medium                                              | 1.33 (0.99, 1.79)              | 0.06    |               |      |               |      | 1.73 (1.22, 2.46)              | 0.002   |               |      |             |      |
| High                                                | 1.69 (1.26, 2.26)              | <0.001  |               |      |               |      | 1.88 (1.33, 2.66)              | <0.001  |               |      |             |      |
| <b>12 Urbanization Index Components<sup>d</sup></b> |                                |         |               |      |               |      |                                |         |               |      |             |      |
| Population Density                                  | 1.16 (0.99, 1.36)              | 0.07    | 0.16 (0.09)   | 0.05 | 0.06 (0.07)   | 0.02 | 1.19 (0.99, 1.43)              | 0.06    | 0.14 (0.09)   | 0.04 | 0.27 (0.09) | 0.07 |
| Social Services                                     | 1.06 (0.92, 1.21)              | 0.42    | 0.17 (0.10)   | 0.05 | 0.07 (0.07)   | 0.02 | 1.22 (1.05, 1.42)              | 0.01    | 0.13 (0.08)   | 0.04 | 0.25 (0.09) | 0.07 |
| Health Infrastructure                               | 1.28 (1.01, 1.63)              | 0.04    | 0.15 (0.09)   | 0.04 | 0.07 (0.07)   | 0.02 | 1.15 (0.87, 1.52)              | 0.32    | 0.14 (0.09)   | 0.04 | 0.29 (0.09) | 0.08 |
| Modern Markets                                      | 1.40 (1.12, 1.76)              | 0.004   | 0.19 (0.10)   | 0.05 | 0.05 (0.06)   | 0.01 | 1.37 (1.04, 1.80)              | 0.02    | 0.14 (0.09)   | 0.04 | 0.27 (0.09) | 0.07 |
| Traditional Markets                                 | 1.29 (1.04, 1.59)              | 0.02    | 0.19 (0.10)   | 0.05 | 0.06 (0.07)   | 0.02 | 1.42 (1.10, 1.83)              | 0.01    | 0.16 (0.10)   | 0.04 | 0.26 (0.09) | 0.07 |
| Transportation Infrastructure                       | 1.02 (0.93, 1.11)              | 0.71    | 0.17 (0.10)   | 0.05 | 0.07 (0.07)   | 0.02 | 1.10 (0.99, 1.23)              | 0.07    | 0.15 (0.09)   | 0.04 | 0.27 (0.09) | 0.07 |
| Communications                                      | 1.37 (1.15, 1.63) <sup>e</sup> | <0.001  | 0.15 (0.09)   | 0.04 | 0.03 (0.06)   | 0.01 | 1.39 (1.13, 1.71) <sup>†</sup> | 0.002   | 0.11 (0.07)   | 0.03 | 0.25 (0.09) | 0.07 |
| Housing Infrastructure                              | 1.42 (1.14, 1.76) <sup>e</sup> | 0.002   | 0.19 (0.10)   | 0.05 | 0.04 (0.06)   | 0.01 | 1.33 (1.03, 1.73)              | 0.03    | 0.16 (0.10)   | 0.04 | 0.27 (0.09) | 0.07 |
| Sanitation                                          | 1.46 (1.15, 1.85) <sup>e</sup> | 0.002   | 0.16 (0.09)   | 0.05 | 0.05 (0.06)   | 0.01 | 1.49 (1.13, 1.96)              | 0.004   | 0.13 (0.08)   | 0.04 | 0.25 (0.09) | 0.07 |
| Economic Activity                                   | 1.41 (1.14, 1.75) <sup>e</sup> | 0.002   | 0.17 (0.09)   | 0.05 | 0.05 (0.07)   | 0.01 | 1.27 (0.99, 1.64)              | 0.06    | 0.14 (0.09)   | 0.04 | 0.27 (0.09) | 0.07 |
| Education                                           | 1.24 (1.11, 1.39) <sup>e</sup> | <0.001  | 0.16 (0.09)   | 0.05 | 0.04 (0.06)   | 0.01 | 1.09 (0.94, 1.26)              | 0.27    | 0.14 (0.09)   | 0.04 | 0.28 (0.09) | 0.08 |
| Education and Income Diversity                      | 1.35 (1.15, 1.57) <sup>e</sup> | <0.001  | 0.14 (0.08)   | 0.04 | 0.04 (0.06)   | 0.01 | 1.19 (0.99, 1.43)              | 0.07    | 0.13 (0.08)   | 0.03 | 0.28 (0.09) | 0.08 |

<sup>a</sup>26 separate sex-stratified multilevel models for total urbanisation and its components

<sup>b</sup>Diabetes defined as a fasting blood glucose  $\geq 7.0$  mmol/l and/or HbA<sub>1c</sub>  $\geq 6.5\%$  (48 mmol/mol), or doctor diagnosis of diabetes

<sup>c</sup>ORs for diabetes prevalence presented for medium (59.0-82.2) and high ( $\geq 82.3$ ) (range 30.4-106.6) relative to low urbanisation level (<59.0)

<sup>d</sup>ORs for diabetes prevalence presented for the 75<sup>th</sup> (high) relative to the 25<sup>th</sup> (low) percentile of each of the 12 urbanisation index components

<sup>e</sup>OR statistically significant at bonferroni-corrected  $p < 0.002$  (type 1 error rate=0.05 across 24 models) by two-tailed z test
